# Supplementary material for: Discordance between germline genetic findings and abnormal tumor immunohistochemistry staining of mismatch repair proteins in individuals with suspected Lynch syndrome
Source: Frontiers journal article supplement (doi:10.3389/fonc.2023.1069467), 2023-01-30
Supplement: Data_Sheet_1.pdf [file Data_Sheet_1.pdf]

**Supplemental Table 1.** Concordance between IHC patterns and germline MMR gene PVs. Green-shaded cells represent germline PVs expected by the corresponding IHC result. Red-shaded cells represent germline PVs that were unexpected based on the corresponding IHC result.

|                     | Germline PV |                   |             |             |
|---------------------|-------------|-------------------|-------------|-------------|
| IHC pattern         | <i>MLH1</i> | <i>MSH2/EPCAM</i> | <i>MSH6</i> | <i>PMS2</i> |
| MLH1                |             |                   |             |             |
| MLH1/MSH2           |             |                   |             |             |
| MLH1/MSH2/MSH6      |             |                   |             |             |
| MLH1/MSH2/PMS2      |             |                   |             |             |
| MLH1/MSH2/MSH6/PMS2 |             |                   |             |             |
| MLH1/MSH6           |             |                   |             |             |
| MLH1/MSH6/PMS2      |             |                   |             |             |
| MLH1/PMS2           |             |                   |             |             |
| MSH2                |             |                   |             |             |
| MSH2/MSH6           |             |                   |             |             |
| MSH2/MSH6/PMS2      |             |                   |             |             |
| MSH2/PMS2           |             |                   |             |             |
| MSH6                |             |                   |             |             |
| MSH6/PMS2           |             |                   |             |             |
| PMS2                |             |                   |             |             |

**Supplemental Table 2.** IHC patterns in cases with monoallelic *MUTYH* PVs identified.

| IHC patterns | Germline monoallelic <i>MUTYH</i> PV |
|--------------|--------------------------------------|
| MSH6         | c.1227_1228dupGG (p.Glu410Glyfs*43)  |
| MSH2; MSH6   | c.933+3A>C                           |
| MLH1; PMS2   | c.934-2A>G                           |
| MLH1; PMS2   | c.536A>G (p.Tyr179Cys)               |
| MLH1         | c.1187G>A (p.Gly396Asp)              |
| MLH1         | c.1187G>A (p.Gly396Asp)              |
